# Supplementary material for: Identifying global patterns of stochasticity and nonlinearity in the Earth System
Source: Copernicus journal article supplement (doi:10.5194/esd-2016-12), 2016-04-19
Supplement: Supplementary file 1 [file esd-2016-12-supplement.pdf]

# Supplementary information to Identifying global patterns of stochasticity and nonlinearity in the Earth System

Fernando Arizmendi<sup>†</sup>, Marcelo Barreiro<sup>†</sup>, and Cristina Masoller<sup>§\*</sup>

<sup>†</sup>*Instituto de Física, Facultad de Ciencias, Universidad de la República, Iguá 4225, Montevideo, Uruguay and*

<sup>§</sup>*Departament de Física, Universitat Politècnica de Catalunya, 08222 Terrassa, Barcelona, Spain*

(Dated: March 30, 2016)

We present a detailed analysis of the measure proposed in the main text to assess atmospheric response to solar forcing: we analyse the role of the interval in which we search for the minimum distance between time series, and we compare with an alternative measure. We also present a comparison of the results obtained from the two databases (NCEP CDAS1 and ERA Interim).

In the main text we search for the minimum of the difference between two time-series,  $x_i(t)$  and  $y_i(t)$ , Eq. (1) (reproduced here for convenience),

$$d_i = \sum_{t=1}^L |y_i(t) - x_i(t + \tau_i)|, \quad (1)$$

with  $\tau_i$  in the interval  $[0, 4]$ . In Fig. 1 we discuss the influence of searching the minimum in the intervals  $[0, 2]$ ,  $[0, 3]$  and  $[0, 5]$ . We observe that similar spatial patterns are obtained, confirming the robustness of the method-

ology.

As discussed in the main text, if instead of using  $|y_i(t) - x_i(t + \tau_i)|$  to define the difference, we use  $(y_i(t) - x_i(t + \tau_i))^2$ , then  $d_i$  is equal to  $2(1 - \rho_i)$  where  $\rho_i$  is the cross-correlation coefficient between  $y_i(t)$  and  $x_i(t + \tau_i)$ . In Fig. 2 we compare the two approaches, and again we obtain very similar spatial patterns.

Figures 3 and 4 display the comparison of the results obtained from the two databases (NCEP CDAS1 and ERA Interim) and we observe a good qualitative agreement, except for well-localized regions, where extreme values occur as discussed in the main text.

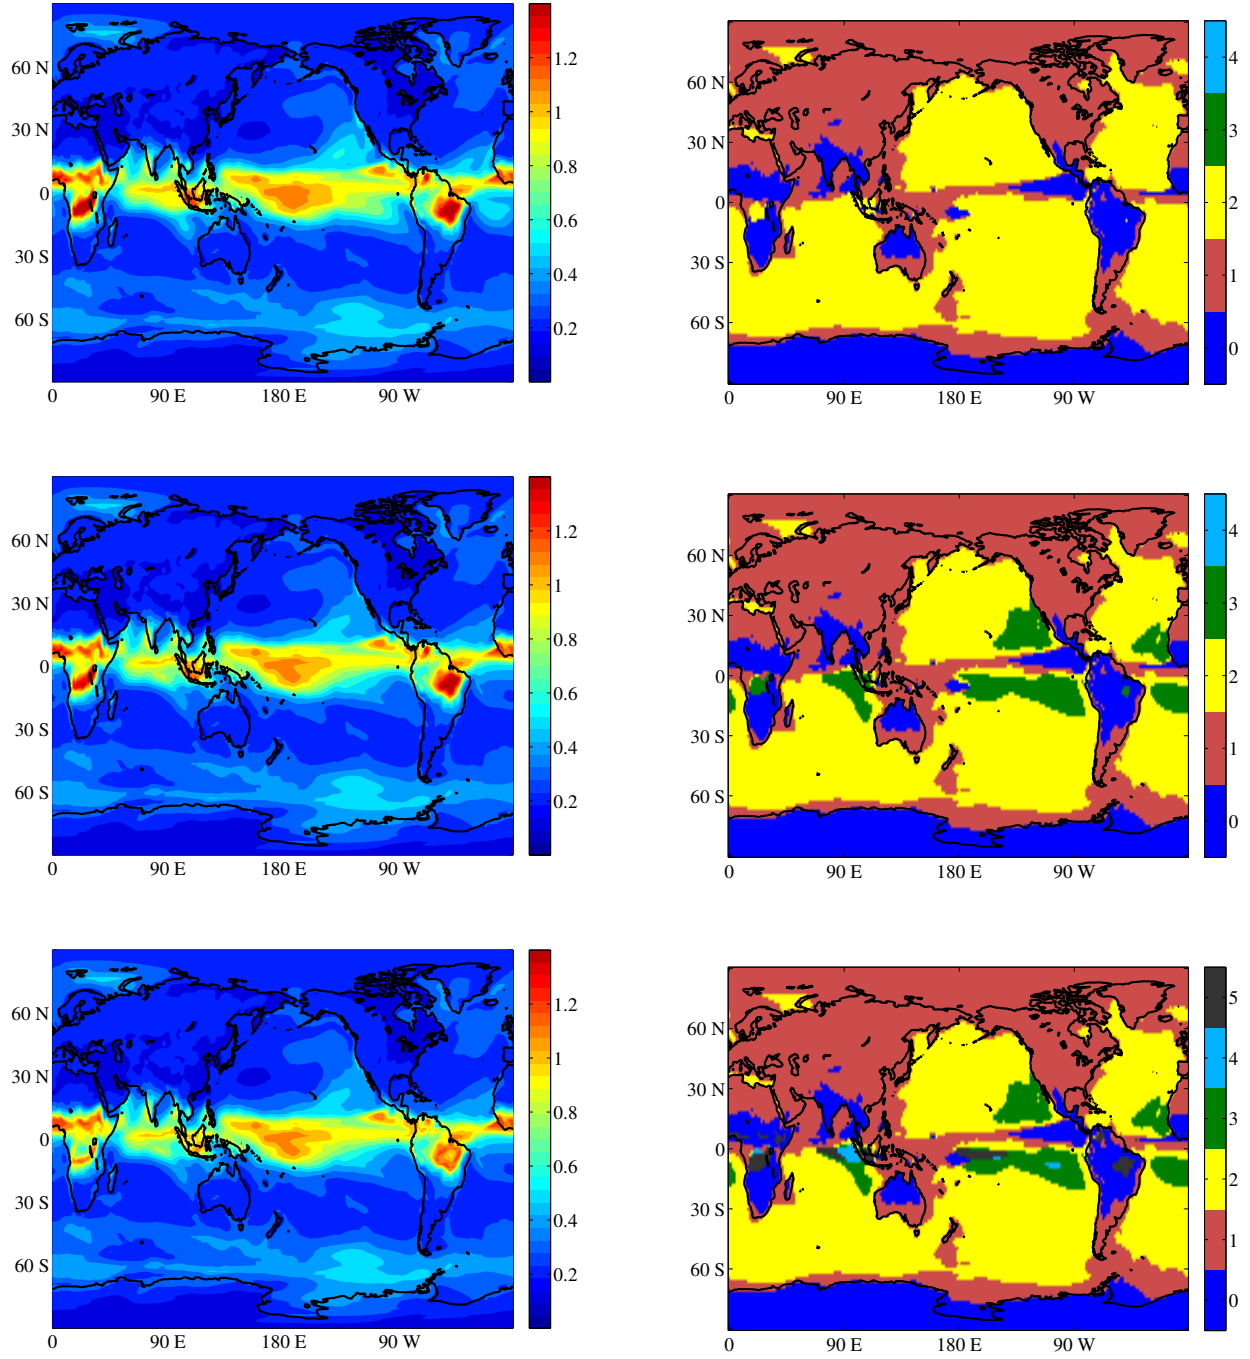

FIG. 1. Maps of distances  $d_i$  (left) calculated from Eq. (1) when the forcing and the response are shifted  $\tau_i \in [0, 2]$  (a),  $\tau_i \in [0, 3]$  (b) and  $\tau_i \in [0, 5]$  (c). Maps of respective lags  $\tau_i$  (left).

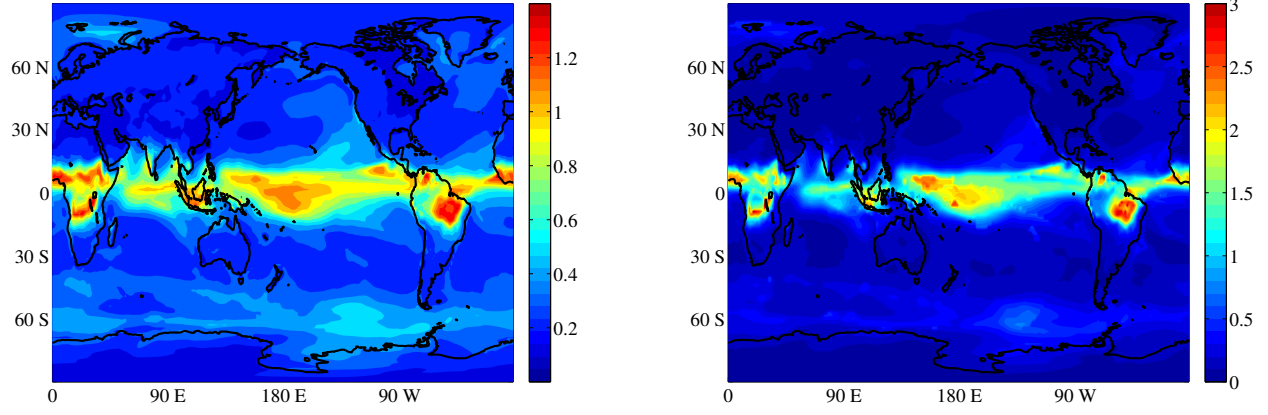

FIG. 2. Map of distances  $d_i$  calculated from Eq. (1) (a), and when is calculated from Eq.(1), but replacing  $|y_i(t) - x_i(t + \tau_i)|$  by  $(y_i(t) - x_i(t + \tau_i))^2$ . In both cases, the forcing and the response are shifted  $\tau_i$ , with  $\tau_i \in [0, 4]$ .

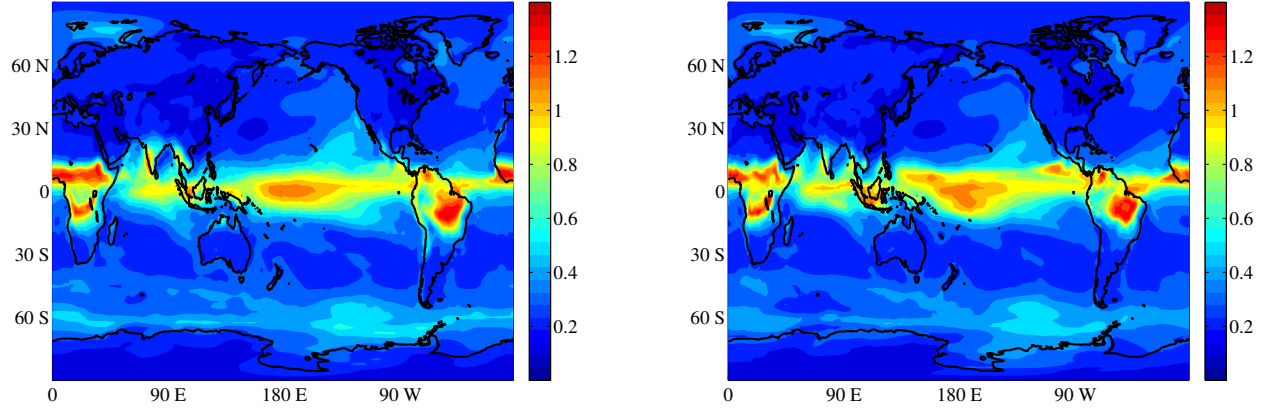

FIG. 3. Map of distances  $d_i$  calculated from Eq. (1) with  $\tau_i \in [0, 4]$  obtained from NCEP CDAS1 (left) and ERA Interim (right).

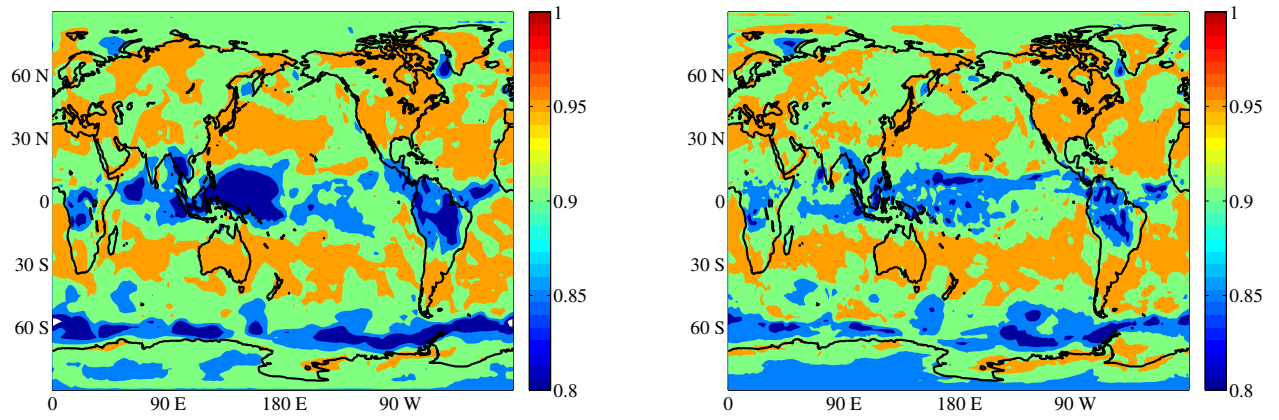

FIG. 4. Entropy maps obtained from NCEP CDAS1 (left) and ERA Interim (right), computed from SAT time-series.
